# Supplementary material for: Evaluation of pea genotype PI180693 partial resistance towards aphanomyces root rot in commercial pea breeding
Source: Front Plant Sci. 2023 Mar 14;14:1114408. doi: 10.3389/fpls.2023.1114408 (PMC10043495; doi:10.3389/fpls.2023.1114408)
Supplement: Supplementary Table 2 — Combined Fisher LSD test results for growth chamber, greenhouse and field trials. [file Table_2.xlsx]

## Sheet: gc_Fisher_LSD_disease score
Fisher LSD test on ANOVA residuals of subset strain UK16, disease score
> print(LSD.test(aov.sub16, "cultivar"))
$statistics
MSerror Df Mean CV t.value LSD
33.45991 32 78.88125 7.333117 2.036933 7.451938
$parameters
test p.ajusted name.t ntr alpha
Fisher-LSD none cultivar 8 0.05
$means
disease.score std r LCL UCL Min Max Q25 Q50 Q75
Linnea 91.616 2.974228 5 86.34668 96.88532 87.33 94.5 90 92.25 94
PI180693 56.400 11.802542 5 51.13068 61.66932 48.00 77.0 50 52.00 55
Z1654-1 78.600 5.319774 5 73.33068 83.86932 70.00 83.0 77 81.00 82
Z1656-1 83.600 2.701851 5 78.33068 88.86932 79.00 86.0 84 84.00 85
Z1701-1 75.034 5.773498 5 69.76468 80.30332 70.00 82.5 71 71.67 80
Z1701-2 84.000 4.743416 5 78.73068 89.26932 77.00 90.0 83 84.00 86
Z1707-1 84.400 2.792848 5 79.13068 89.66932 82.00 89.0 83 83.00 85
Z1707-2 77.400 4.505552 5 72.13068 82.66932 71.00 83.0 76 77.00 80
$comparison
NULL
$groups
disease.score groups
Linnea 91.616 a
Z1707-1 84.400 ab
Z1701-2 84.000 b
Z1656-1 83.600 b
Z1654-1 78.600 bc
Z1707-2 77.400 bc
Z1701-1 75.034 c
PI180693 56.400 d
attr(,"class")
[1] "group"
Fisher LSD test on ANOVA residuals of subset strain SE51, disease score
> print(LSD.test(aov.sub51, "cultivar"))
$statistics
MSerror Df Mean CV t.value LSD
24.94062 32 64.2375 7.774367 2.036933 6.433695
$parameters
test p.ajusted name.t ntr alpha
Fisher-LSD none cultivar 8 0.05
$means
disease.score std r LCL UCL Min Max Q25 Q50 Q75
Linnea 79.25 4.465143 5 74.70069 83.79931 74.00 84.0 75 81.25 82
PI180693 37.55 5.778192 5 33.00069 42.09931 28.75 44.0 36 38.00 41
Z1654-1 61.80 6.942622 5 57.25069 66.34931 56.00 72.0 57 58.00 66
Z1656-1 66.80 1.923538 5 62.25069 71.34931 65.00 70.0 66 66.00 67
Z1701-1 60.00 6.123724 5 55.45069 64.54931 51.00 67.0 58 60.00 64
Z1701-2 69.60 1.140175 5 65.05069 74.14931 68.00 71.0 69 70.00 70
Z1707-1 73.80 4.969909 5 69.25069 78.34931 67.00 78.0 70 77.00 77
Z1707-2 65.10 5.549775 5 60.55069 69.64931 60.00 72.5 60 64.00 69
$comparison
NULL
$groups
disease.score groups
Linnea 79.25 a
Z1707-1 73.80 ab
Z1701-2 69.60 bc
Z1656-1 66.80 cd
Z1707-2 65.10 cde
Z1654-1 61.80 de
Z1701-1 60.00 e
PI180693 37.55 f
attr(,"class")
[1] "group"
Fisher LSD test on ANOVA residuals of subset strain SE58, disease score
> print(LSD.test(aov.sub58, "cultivar"))
$statistics
MSerror Df Mean CV t.value LSD
136.5531 32 41.4625 28.18353 2.036933 15.0542
$parameters
test p.ajusted name.t ntr alpha
Fisher-LSD none cultivar 8 0.05
$means
disease.score std r LCL UCL Min Max Q25 Q50 Q75
Linnea 46.40 10.237187 5 35.755074 57.04493 34.00 61 41 45.00 51
PI180693 31.95 7.583700 5 21.305074 42.59493 23.75 41 28 28.00 39
Z1654-1 48.40 4.037326 5 37.755074 59.04493 44.00 54 45 49.00 50
Z1656-1 45.80 8.899438 5 35.155074 56.44493 38.00 60 39 44.00 48
Z1701-1 19.35 14.598373 5 8.705074 29.99493 1.00 31 6 28.75 30
Z1701-2 44.00 6.041523 5 33.355074 54.64493 37.00 52 40 43.00 48
Z1707-1 54.20 7.259477 5 43.555074 64.84493 46.00 65 50 53.00 57
Z1707-2 41.60 23.071628 5 30.955074 52.24493 4.00 66 40 47.00 51
$comparison
NULL
$groups
disease.score groups
Z1707-1 54.20 a
Z1654-1 48.40 a
Linnea 46.40 ab
Z1656-1 45.80 ab
Z1701-2 44.00 ab
Z1707-2 41.60 ab
PI180693 31.95 bc
Z1701-1 19.35 c
attr(,"class")
[1] "group"

## Sheet: gc_Fisher_LSD_root dry weight
Fisher LSD test on ANOVA residuals of subset strain UK16, root dry weight
> print(LSD.test(aov.sub16_rdw, "cultivar"))
$statistics
MSerror Df Mean CV t.value LSD
0.0005429375 32 0.0467 49.89512 2.036933 0.030018
$parameters
test p.ajusted name.t ntr alpha
Fisher-LSD none cultivar 8 0.05
$means
root.dry.weight std r LCL UCL Min Max Q25 Q50 Q75
Linnea 0.0216 0.01134901 5 0.0003740697 0.04282593 0.007 0.035 0.013 0.026 0.027
PI180693 0.1126 0.04677392 5 0.0913740697 0.13382593 0.035 0.158 0.116 0.116 0.138
Z1654-1 0.0420 0.02531798 5 0.0207740697 0.06322593 0.021 0.085 0.027 0.035 0.042
Z1656-1 0.0270 0.01345362 5 0.0057740697 0.04822593 0.011 0.046 0.020 0.024 0.034
Z1701-1 0.0342 0.01715226 5 0.0129740697 0.05542593 0.015 0.054 0.018 0.038 0.046
Z1701-2 0.0432 0.02101666 5 0.0219740697 0.06442593 0.023 0.074 0.025 0.042 0.052
Z1707-1 0.0280 0.01630951 5 0.0067740697 0.04922593 0.011 0.055 0.022 0.025 0.027
Z1707-2 0.0650 0.01424781 5 0.0437740697 0.08622593 0.050 0.086 0.056 0.061 0.072
$comparison
NULL
$groups
root.dry.weight groups
PI180693 0.1126 a
Z1707-2 0.0650 b
Z1701-2 0.0432 bc
Z1654-1 0.0420 bc
Z1701-1 0.0342 c
Z1707-1 0.0280 c
Z1656-1 0.0270 c
Linnea 0.0216 c
attr(,"class")
[1] "group"
Fisher LSD test on ANOVA residuals of subset strain SE51, root dry weight
> print(LSD.test(aov.sub51_rdw, "cultivar"))
$statistics
MSerror Df Mean CV t.value LSD
0.0005072625 32 0.098425 22.88289 2.036933 0.02901504
$parameters
test p.ajusted name.t ntr alpha
Fisher-LSD none cultivar 8 0.05
$means
root.dry.weight std r LCL UCL Min Max Q25 Q50 Q75
Linnea 0.0496 0.01666733 5 0.02908327 0.07011673 0.031 0.065 0.032 0.059 0.061
PI180693 0.1732 0.02795890 5 0.15268327 0.19371673 0.150 0.217 0.152 0.163 0.184
Z1654-1 0.1012 0.02554799 5 0.08068327 0.12171673 0.063 0.132 0.095 0.102 0.114
Z1656-1 0.0628 0.01896576 5 0.04228327 0.08331673 0.034 0.081 0.054 0.070 0.075
Z1701-1 0.1018 0.01336787 5 0.08128327 0.12231673 0.087 0.121 0.094 0.098 0.109
Z1701-2 0.1046 0.01190798 5 0.08408327 0.12511673 0.087 0.116 0.098 0.110 0.112
Z1707-1 0.0792 0.03144360 5 0.05868327 0.09971673 0.050 0.123 0.052 0.072 0.099
Z1707-2 0.1150 0.02601922 5 0.09448327 0.13551673 0.082 0.154 0.106 0.114 0.119
$comparison
NULL
$groups
root.dry.weight groups
PI180693 0.1732 a
Z1707-2 0.1150 b
Z1701-2 0.1046 bc
Z1701-1 0.1018 bc
Z1654-1 0.1012 bc
Z1707-1 0.0792 cd
Z1656-1 0.0628 de
Linnea 0.0496 e
attr(,"class")
[1] "group"
Fisher LSD test on ANOVA residuals of subset strain SE58, root dry weight
> print(LSD.test(aov.sub58_rdw, "cultivar"))
$statistics
MSerror Df Mean CV t.value LSD
0.001199137 32 0.210275 16.46823 2.036933 0.04461093
$parameters
test p.ajusted name.t ntr alpha
Fisher-LSD none cultivar 8 0.05
$means
root.dry.weight std r LCL UCL Min Max Q25 Q50 Q75
Linnea 0.1560 0.02693511 5 0.1244553 0.1875447 0.124 0.189 0.140 0.149 0.178
PI180693 0.1624 0.02223286 5 0.1308553 0.1939447 0.136 0.194 0.148 0.163 0.171
Z1654-1 0.2228 0.02181055 5 0.1912553 0.2543447 0.195 0.246 0.213 0.216 0.244
Z1656-1 0.2388 0.04244644 5 0.2072553 0.2703447 0.179 0.282 0.222 0.234 0.277
Z1701-1 0.2700 0.03913438 5 0.2384553 0.3015447 0.214 0.310 0.255 0.267 0.304
Z1701-2 0.2584 0.02715327 5 0.2268553 0.2899447 0.224 0.293 0.239 0.266 0.270
Z1707-1 0.1524 0.03066431 5 0.1208553 0.1839447 0.103 0.184 0.150 0.155 0.170
Z1707-2 0.2214 0.05372895 5 0.1898553 0.2529447 0.130 0.272 0.230 0.233 0.242
$comparison
NULL
$groups
root.dry.weight groups
Z1701-1 0.2700 a
Z1701-2 0.2584 ab
Z1656-1 0.2388 ab
Z1654-1 0.2228 b
Z1707-2 0.2214 b
PI180693 0.1624 c
Linnea 0.1560 c
Z1707-1 0.1524 c
attr(,"class")
[1] "group"

## Sheet: gh_Fisher LSD on ds & rdw
Fisher LSD test on ANOVA residuals of disease score ~ cultivar in greenhouse trials
> print(LSD.test(aov.51, "cultivar"))
$statistics
MSerror Df Mean CV t.value LSD
30.17313 32 67.99175 8.078933 2.036933 7.076476
$parameters
test p.ajusted name.t ntr alpha
Fisher-LSD none cultivar 8 0.05
$means
disease.index std r LCL UCL Min Max Q25 Q50 Q75
Linnea 73.556 7.661637 5 68.55218 78.55982 60.00 77.78 75.0 77.5 77.50
PI180693 49.144 7.278645 5 44.14018 54.14782 37.22 55.00 48.5 50.0 55.00
Z1654-1 66.000 2.850439 5 60.99618 71.00382 62.50 70.00 65.0 65.0 67.50
Z1656-1 68.534 3.952377 5 63.53018 73.53782 62.22 72.50 67.5 70.0 70.45
Z1701-1 73.000 5.968668 5 67.99618 78.00382 62.50 77.50 75.0 75.0 75.00
Z1701-2 72.388 2.648154 5 67.38418 77.39182 69.44 75.00 70.0 72.5 75.00
Z1707-1 72.312 6.996193 5 67.30818 77.31582 63.50 80.56 67.5 72.5 77.50
Z1707-2 69.000 3.791438 5 63.99618 74.00382 62.50 72.50 70.0 70.0 70.00
$comparison
NULL
$groups
disease.index groups
Linnea 73.556 a
Z1701-1 73.000 ab
Z1701-2 72.388 ab
Z1707-1 72.312 ab
Z1707-2 69.000 ab
Z1656-1 68.534 ab
Z1654-1 66.000 b
PI180693 49.144 c
attr(,"class")
[1] "group"
Fisher LSD test on ANOVA residuals of rood dry weight ~ cultivar in greenhouse trials
> print(LSD.test(aov.rdw, "cultivar"))
$statistics
MSerror Df Mean CV t.value LSD
0.0001425 32 0.1185 10.0737 2.036933 0.01537851
$parameters
test p.ajusted name.t ntr alpha
Fisher-LSD none cultivar 8 0.05
$means
root.dry.weight std r LCL UCL Min Max Q25 Q50 Q75
Linnea 0.104 0.005477226 5 0.09312575 0.1148742 0.10 0.11 0.10 0.10 0.11
PI180693 0.148 0.008366600 5 0.13712575 0.1588742 0.14 0.16 0.14 0.15 0.15
Z1654-1 0.128 0.019235384 5 0.11712575 0.1388742 0.10 0.15 0.12 0.13 0.14
Z1656-1 0.122 0.013038405 5 0.11112575 0.1328742 0.11 0.14 0.11 0.12 0.13
Z1701-1 0.120 0.010000000 5 0.10912575 0.1308742 0.11 0.13 0.11 0.12 0.13
Z1701-2 0.100 0.010000000 5 0.08912575 0.1108742 0.09 0.11 0.09 0.10 0.11
Z1707-1 0.102 0.013038405 5 0.09112575 0.1128742 0.09 0.12 0.09 0.10 0.11
Z1707-2 0.124 0.011401754 5 0.11312575 0.1348742 0.11 0.14 0.12 0.12 0.13
$comparison
NULL
$groups
root.dry.weight groups
PI180693 0.148 a
Z1654-1 0.128 b
Z1707-2 0.124 b
Z1656-1 0.122 b
Z1701-1 0.120 b
Linnea 0.104 c
Z1707-1 0.102 c
Z1701-2 0.100 c
attr(,"class")
[1] "group"

## Sheet: 2020_field_Z20EA
Fisher LSD for disease score ~ cultivar ANOVA residuals in field Z20EA 2020
> print(LSD.test(fieldA.aov_ds, "cultivar"))
$statistics
MSerror Df Mean CV
11.04065 9 53.43546 6.218244
$parameters
test p.ajusted name.t ntr alpha
Fisher-LSD none cultivar 8 0.05
$means
disease.index std r LCL UCL Min Max Q25 Q50 Q75
Linnea 63.75000 1.767767 2 58.43498 69.06502 62.5 65.00000 63.12500 63.75000 64.37500
PI180693 55.00000 5.000000 3 50.66030 59.33970 50.0 60.00000 52.50000 55.00000 57.50000
Z1654-1 52.50000 3.535534 2 47.18498 57.81502 50.0 55.00000 51.25000 52.50000 53.75000
Z1656-1 51.56250 2.209709 2 46.24748 56.87752 50.0 53.12500 50.78125 51.56250 52.34375
Z1701-1 51.38889 1.964186 2 46.07387 56.70391 50.0 52.77778 50.69444 51.38889 52.08333
Z1701-2 50.00000 0.000000 2 44.68498 55.31502 50.0 50.00000 50.00000 50.00000 50.00000
Z1707-1 50.00000 3.535534 2 44.68498 55.31502 47.5 52.50000 48.75000 50.00000 51.25000
Z1707-2 52.50000 3.535534 2 47.18498 57.81502 50.0 55.00000 51.25000 52.50000 53.75000
$comparison
NULL
$groups
disease.index groups
Linnea 63.75000 a
PI180693 55.00000 b
Z1654-1 52.50000 b
Z1707-2 52.50000 b
Z1656-1 51.56250 b
Z1701-1 51.38889 b
Z1701-2 50.00000 b
Z1707-1 50.00000 b
attr(,"class")
[1] "group"
Fisher LSD for emergence ~ cultivar ANOVA residuals in field Z20EA 2020
> print(LSD.test(fieldA.aov_em, "cultivar"))
$statistics
MSerror Df Mean CV
9.837963 9 89.85294 3.490762
$parameters
test p.ajusted name.t ntr alpha
Fisher-LSD none cultivar 8 0.05
$means
emergence std r LCL UCL Min Max Q25 Q50 Q75
Linnea 72.50000 7.071068 2 67.48281 77.51719 67.5 77.5 70.000 72.50 75.000
PI180693 91.66667 3.818813 3 87.57015 95.76318 87.5 95.0 90.000 92.50 93.750
Z1654-1 97.50000 0.000000 2 92.48281 102.51719 97.5 97.5 97.500 97.50 97.500
Z1656-1 88.75000 1.767767 2 83.73281 93.76719 87.5 90.0 88.125 88.75 89.375
Z1701-1 87.50000 0.000000 2 82.48281 92.51719 87.5 87.5 87.500 87.50 87.500
Z1701-2 96.25000 1.767767 2 91.23281 101.26719 95.0 97.5 95.625 96.25 96.875
Z1707-1 86.25000 1.767767 2 81.23281 91.26719 85.0 87.5 85.625 86.25 86.875
Z1707-2 97.50000 0.000000 2 92.48281 102.51719 97.5 97.5 97.500 97.50 97.500
$comparison
NULL
$groups
emergence groups
Z1654-1 97.50000 a
Z1707-2 97.50000 a
Z1701-2 96.25000 a
PI180693 91.66667 ab
Z1656-1 88.75000 b
Z1701-1 87.50000 b
Z1707-1 86.25000 b
Linnea 72.50000 c
attr(,"class")
[1] "group"

## Sheet: 2020_field_Z20EB
Fisher LSD for disease score ~ cultivar ANOVA residuals in field Z20EB 2020
> print(LSD.test(fieldB.aov_ds, "cultivar"))
$statistics
MSerror Df Mean CV
9.569439 15 69.72359 4.436735
$parameters
test p.ajusted name.t ntr alpha
Fisher-LSD none cultivar 8 0.05
$means
disease.index std r LCL UCL Min Max Q25 Q50 Q75
Linnea 72.90825 3.328027 6 70.21645 75.60005 67.50000 77.50000 72.29167 72.61364 74.43182
PI180693 64.13636 2.632835 5 61.18765 67.08508 61.36364 68.18182 62.50000 63.63636 65.00000
Z1654-1 70.11364 3.696240 2 65.45130 74.77597 67.50000 72.72727 68.80682 70.11364 71.42045
Z1656-1 66.70455 1.124943 2 62.04221 71.36688 65.90909 67.50000 66.30682 66.70455 67.10227
Z1701-1 71.25000 5.303301 2 66.58767 75.91233 67.50000 75.00000 69.37500 71.25000 73.12500
Z1701-2 70.93750 1.325825 2 66.27517 75.59983 70.00000 71.87500 70.46875 70.93750 71.40625
Z1707-1 71.25000 1.767767 2 66.58767 75.91233 70.00000 72.50000 70.62500 71.25000 71.87500
Z1707-2 72.50000 3.535534 2 67.83767 77.16233 70.00000 75.00000 71.25000 72.50000 73.75000
$comparison
NULL
$groups
disease.index groups
Linnea 72.90825 a
Z1707-2 72.50000 ab
Z1701-1 71.25000 ab
Z1707-1 71.25000 ab
Z1701-2 70.93750 ab
Z1654-1 70.11364 ab
Z1656-1 66.70455 bc
PI180693 64.13636 c
attr(,"class")
[1] "group"
Fisher LSD for emergence ~ cultivar ANOVA residuals in field Z20EB 2020
> print(LSD.test(fieldB.aov_em, "cultivar"))
$statistics
MSerror Df Mean CV
49.18056 15 78.15217 8.973372
$parameters
test p.ajusted name.t ntr alpha
Fisher-LSD none cultivar 8 0.05
$means
emergence std r LCL UCL Min Max Q25 Q50 Q75
Linnea 70.83333 10.206207 6 64.73100 76.93567 57.5 87.5 65.625 70.00 74.375
PI180693 69.00000 3.791438 5 62.31523 75.68477 62.5 72.5 70.000 70.00 70.000
Z1654-1 90.00000 0.000000 2 79.43044 100.56956 90.0 90.0 90.000 90.00 90.000
Z1656-1 81.25000 5.303301 2 70.68044 91.81956 77.5 85.0 79.375 81.25 83.125
Z1701-1 88.75000 5.303301 2 78.18044 99.31956 85.0 92.5 86.875 88.75 90.625
Z1701-2 81.25000 8.838835 2 70.68044 91.81956 75.0 87.5 78.125 81.25 84.375
Z1707-1 77.50000 3.535534 2 66.93044 88.06956 75.0 80.0 76.250 77.50 78.750
Z1707-2 95.00000 3.535534 2 84.43044 105.56956 92.5 97.5 93.750 95.00 96.250
$comparison
NULL
$groups
emergence groups
Z1707-2 95.00000 a
Z1654-1 90.00000 ab
Z1701-1 88.75000 ab
Z1656-1 81.25000 abc
Z1701-2 81.25000 abc
Z1707-1 77.50000 bc
Linnea 70.83333 c
PI180693 69.00000 c
attr(,"class")
[1] "group"

## Sheet: 2022_field_R-22-10-91
Fisher LSD for disease score ~ cultivar*block ANOVA residuals in field R-22-10-91
> print(LSD.test(res.aovC, "cultivar"))
$statistics
MSerror Df Mean CV t.value LSD
18.29075 16 23.43219 18.25168 2.119905 6.410874
$parameters
test p.ajusted name.t ntr alpha
Fisher-LSD none cultivar 8 0.05
$means
disease.index std r LCL UCL Min Max Q25 Q50 Q75
Linnea 25.0800 4.454840 4 20.54683 29.61317 19.0 29.50 23.5000 25.910 27.4900
PI180693 31.8525 5.826694 4 27.31933 36.38567 24.5 38.50 29.3075 32.205 34.7500
Z1654-1 18.8075 2.615000 4 14.27433 23.34067 17.5 22.73 17.5000 17.500 18.8075
Z1656-1 22.6250 3.591077 4 18.09183 27.15817 19.0 27.00 20.1250 22.250 24.7500
Z1701-1 19.0000 3.000000 4 14.46683 23.53317 15.5 21.50 17.0000 19.500 21.5000
Z1701-2 23.5575 2.850712 4 19.02433 28.09067 21.5 27.73 21.8750 22.500 24.1825
Z1707-1 21.3175 11.494516 4 16.78433 25.85067 14.5 38.50 15.2125 16.135 22.2400
Z1707-2 25.2175 8.374081 4 20.68433 29.75067 17.5 37.00 20.7400 23.185 27.6625
$comparison
NULL
$groups
disease.index groups
PI180693 31.8525 a
Z1707-2 25.2175 b
Linnea 25.0800 bc
Z1701-2 23.5575 bc
Z1656-1 22.6250 bc
Z1707-1 21.3175 bc
Z1701-1 19.0000 bc
Z1654-1 18.8075 c
attr(,"class")
[1] "group"
